# Supplementary material
Source: MDPI journal article supplement (https://www.mdpi.com/2673-4176/5/2/5)
Supplement: s1 [file s1 › polysaccharides-2918336-supplementary.pdf]

## Supporting informations

# Concentrated O/W Emulsion Stability of Non-Ionic Chitosan Oligomer Surfactants Modified by Epoxidized Fatty Chains at pH7: Influence of Emulsification Conditions

Steve Berthelon <sup>1</sup>, J  r  my Frugier <sup>2</sup>, Nathalie Azema <sup>2</sup>, Claire Negrell <sup>1</sup> and Ghislain David <sup>1,\*</sup>

<sup>1</sup> ICGM, Univ. Montpellier, CNRS, ENSCM, Montpellier, France

<sup>2</sup> LMGC, IMT Mines Ales, Univ Montpellier, CNRS, Al  s, France

Corresponding Author

\* Email: ghislain.david@enscm.fr

## Characterizations of synthesized molecules

### *Characterization of COS-oxime*

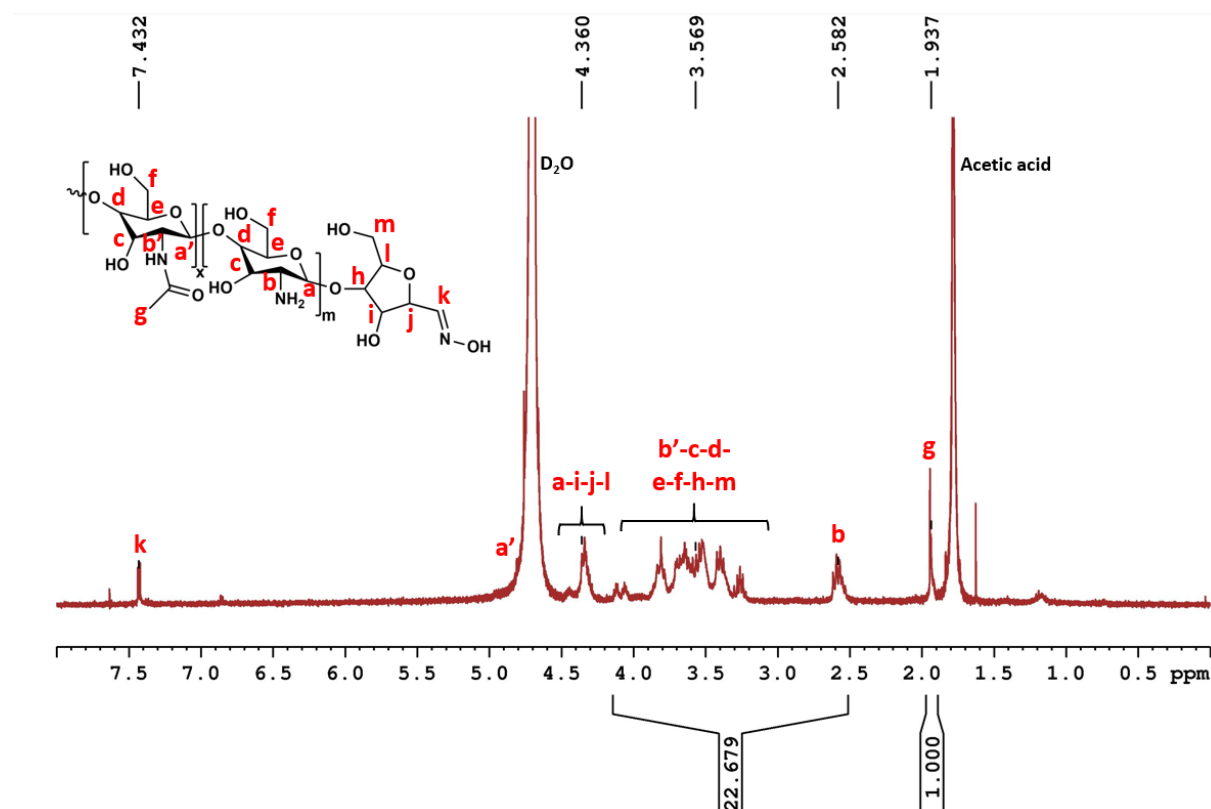

Figure S1. <sup>1</sup>H NMR (400 MHz, D<sub>2</sub>O) spectrum, and proton assignments for DP10-oxime.

### Characterization of COS-C9

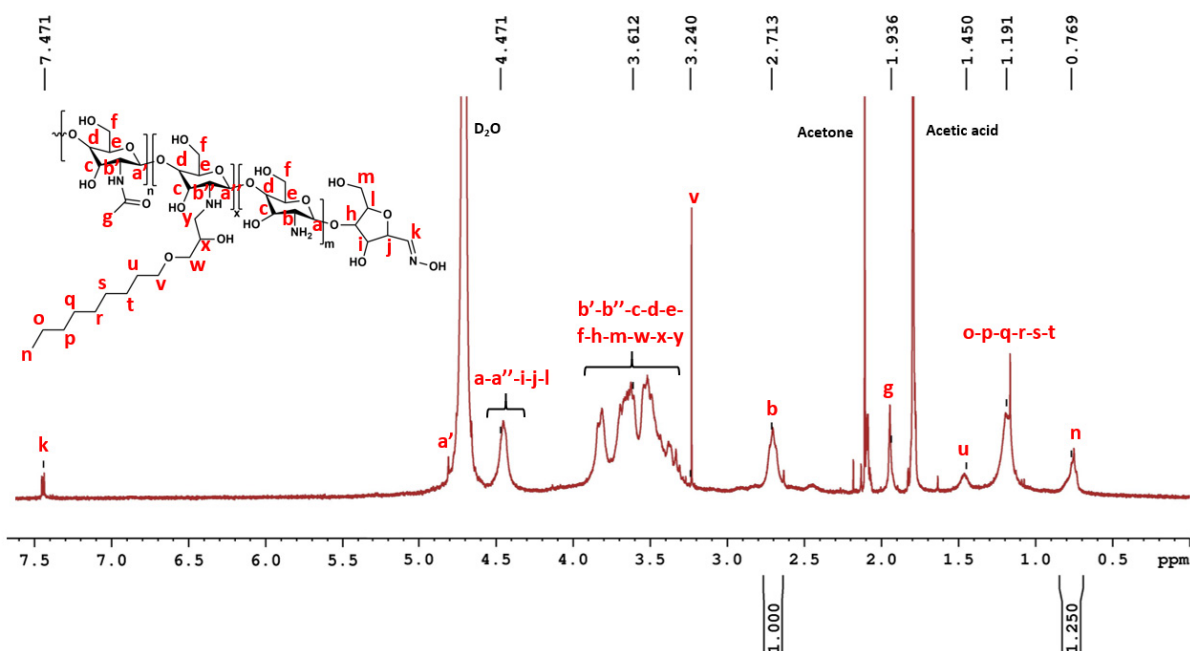

Figure S2. <sup>1</sup>H NMR (400 MHz, D<sub>2</sub>O) spectrum, and proton assignments for DP10-C9.

### Characterization of COS-C16

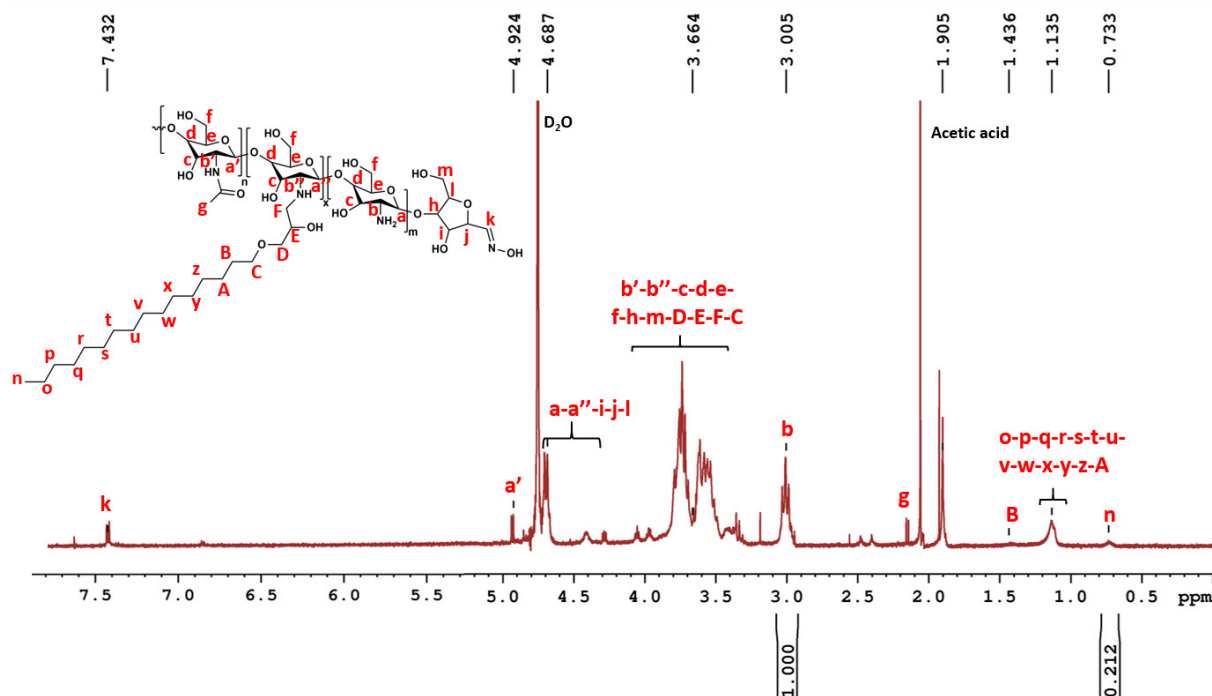

Figure S3. <sup>1</sup>H NMR (400 MHz, D<sub>2</sub>O) spectrum, and proton assignments for DP10-C16.

## Characterization of COS-card

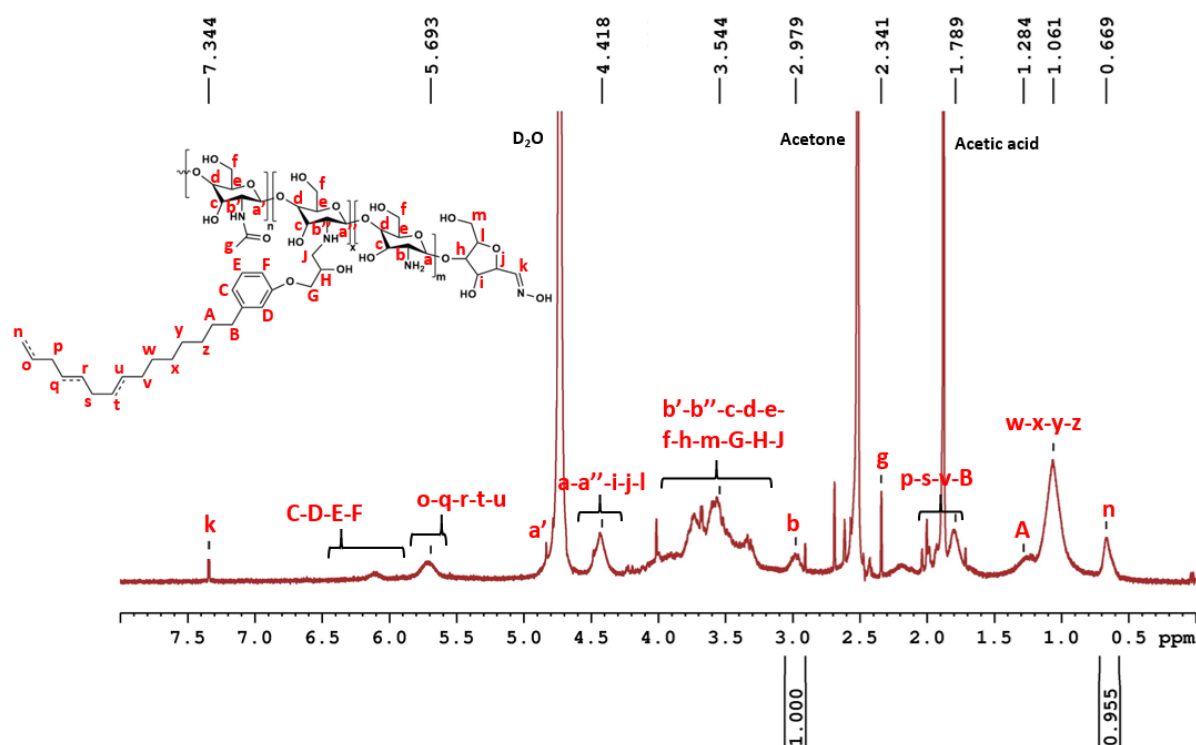

Figure S4.  $^1\text{H}$  NMR (400 MHz,  $\text{D}_2\text{O}$ ) spectrum, and proton assignments for DP10-card.

## Characterizations of emulsions

### Comparison of average droplet size using two different methods

| Method used      | 1 minute | 2 minutes | 3 minutes | 4 minutes |
|------------------|----------|-----------|-----------|-----------|
| Light scattering | 14.9     | 14.2      | 13.9      | 13.9      |
| Image J          | 14.8     | 13.9      | 13.7      | 13.8      |

Figure S5. Comparison of average droplet size (in  $\mu\text{m}$ ) determination by light scattering and Image J (microcopy images) for the experiment as a function of stirring time. For the Image J results, average droplet size was calculated by averaging 200 droplets for each sample.

### *Rheological measurements to highlight the anti-thixotropic behavior*

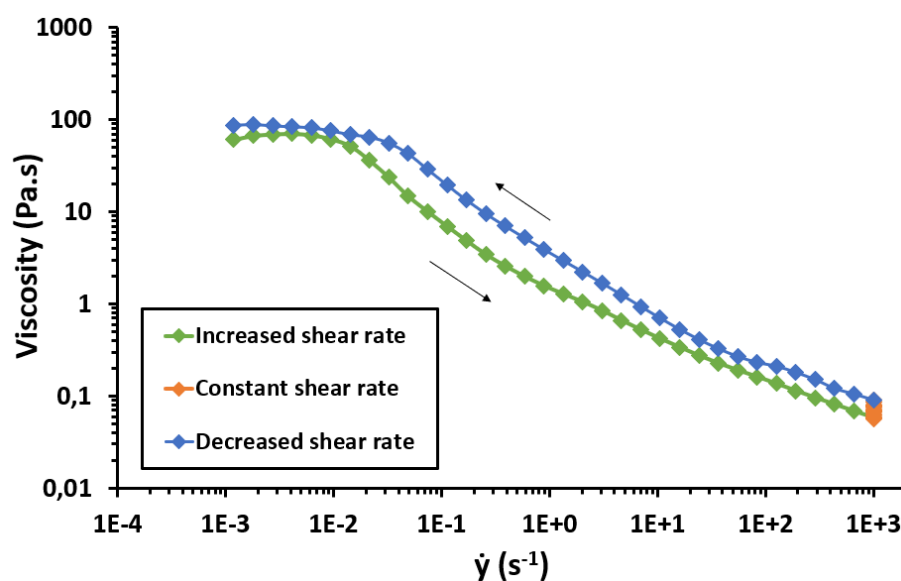

**Figure S6.** Viscosity profile of the emulsion with D10-card surfactant (stirring speed of 16500 rpm and stirring time of 4 minutes). An increase and then a decrease in shear rate were used to highlight the anti-thixotropic behavior.

### *Size distribution of emulsions as a function of stirring time*

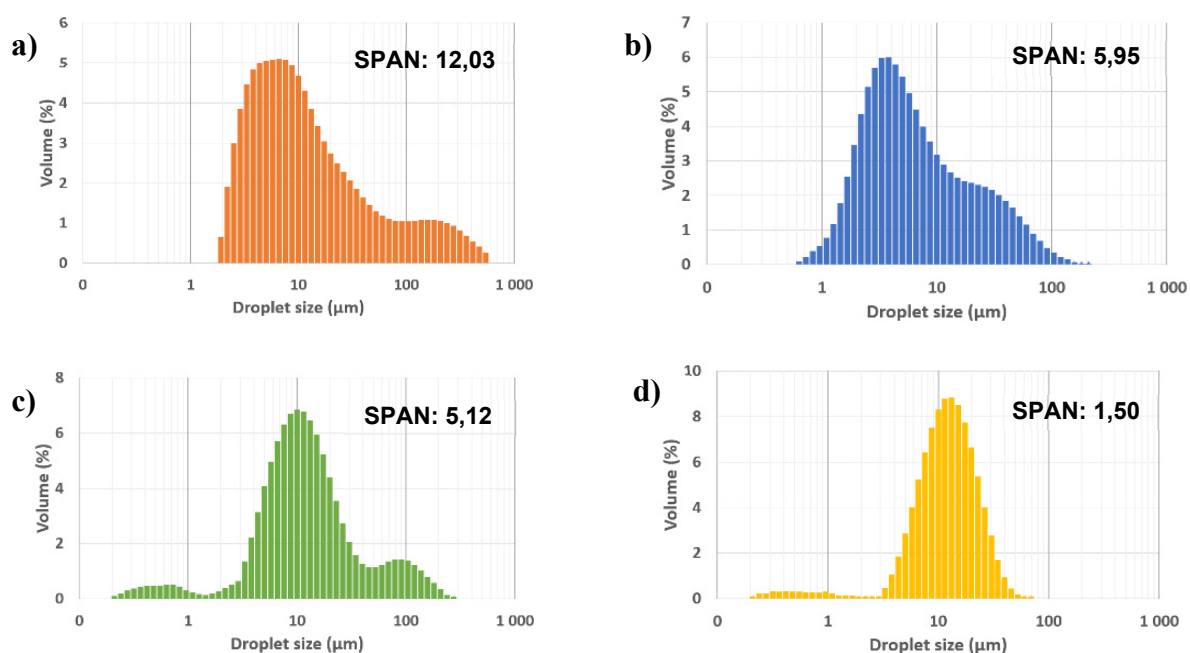

**Figure S7.** Size distribution of emulsion with DP10-card surfactant at a) 1 minute of stirring; b) 2 minutes of stirring; c) 3 minutes of stirring; d) 4 minutes of stirring.

### *Size distribution of emulsions as a function of stirring speed*

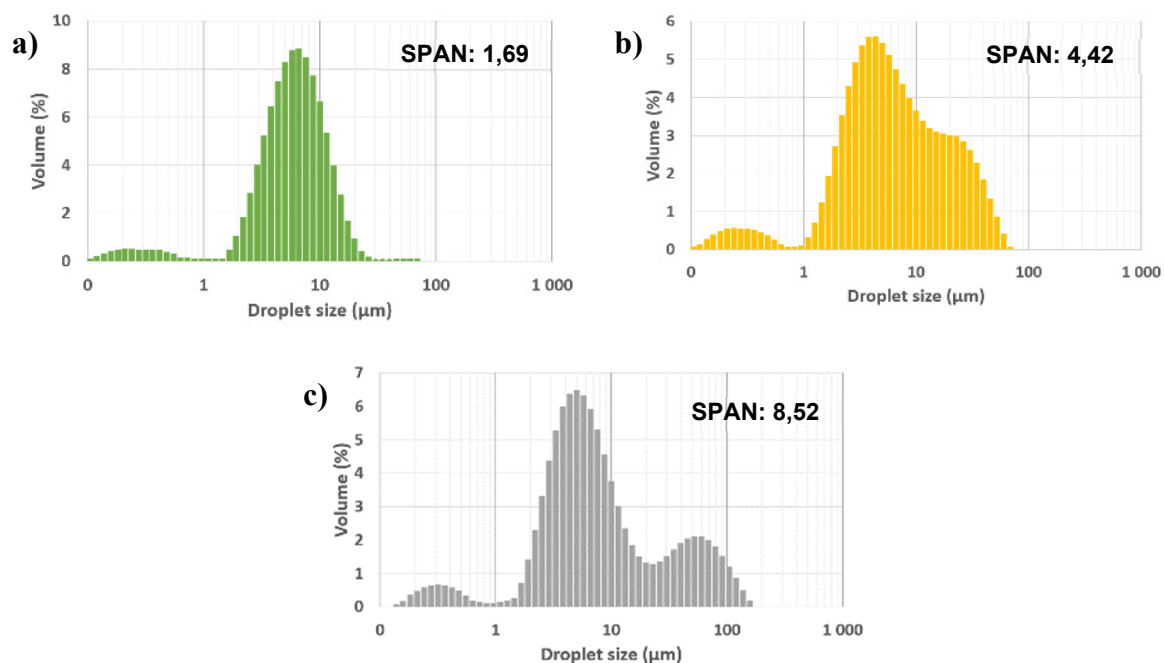

**Figure S8.** Size distribution of emulsion with DP10-card surfactant at a) 16500 rpm; b) 20500 rpm; c) 24500 rpm.

### *Highlighting the appearance of internal droplets by optical microscopy image*

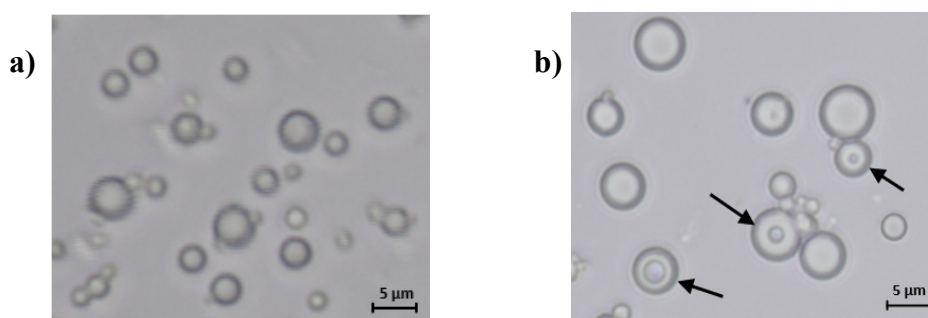

**Figure S9.** Optical microscopy images of a) an emulsion at a stirring speed of 16500 rpm; b) an emulsion at a stirring speed of 24500 rpm. Internal droplets are shown with arrows.

### *Highlighting the appearance of flocs by optical microscopy image*

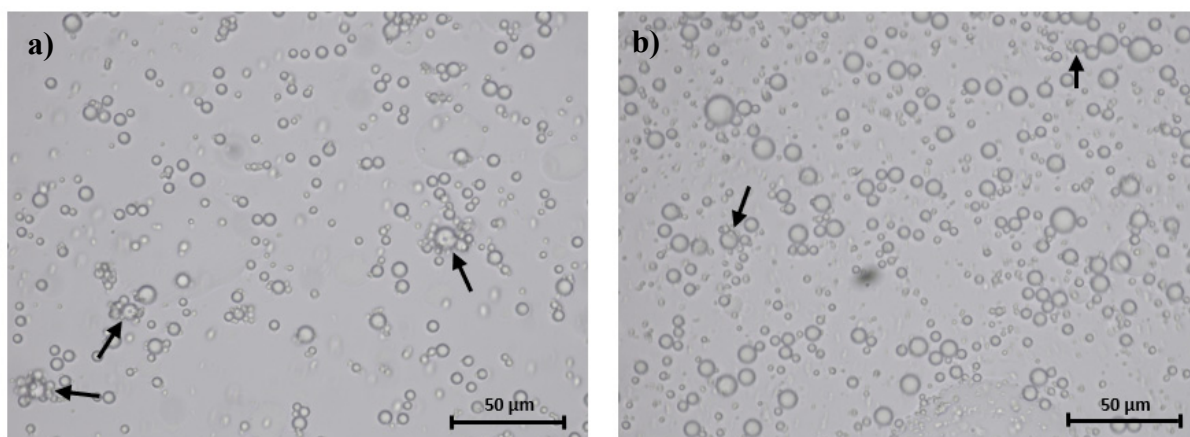

**Figure S10.** Optical microscopy images of diluted emulsions (x200) at t0 with a) DP10-card surfactant; b) DP20-C9 surfactant. Flocs are shown with arrows.

### *%BS and %T evolution over time*

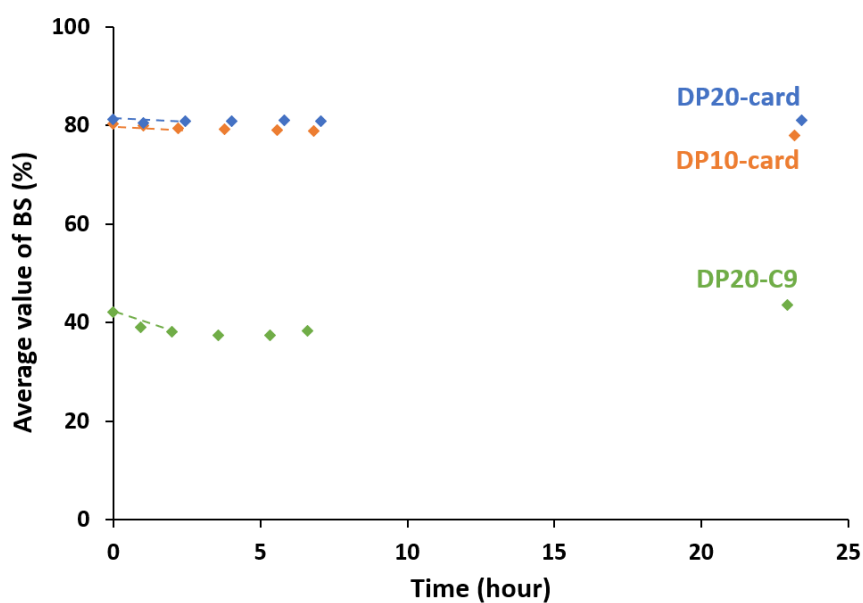

**Figure S11.** Backscattering percentage values over time for DP10-card, DP20-card and DP20-C9. Kinetics of flocculation/coalescence were measured during the first 4 hours of storage.

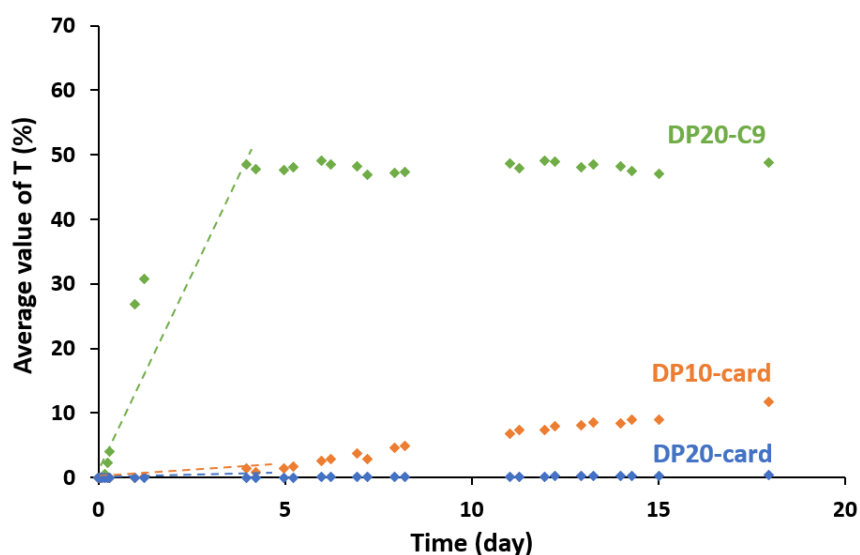

**Figure S12.** Transmission percentage values over time for DP10-card, DP20-card and DP20-C9. Kinetics of aqueous phase formation were measured during the first 5 days of storage using the slope at the origin.

### Profiles evolution of Turbiscan

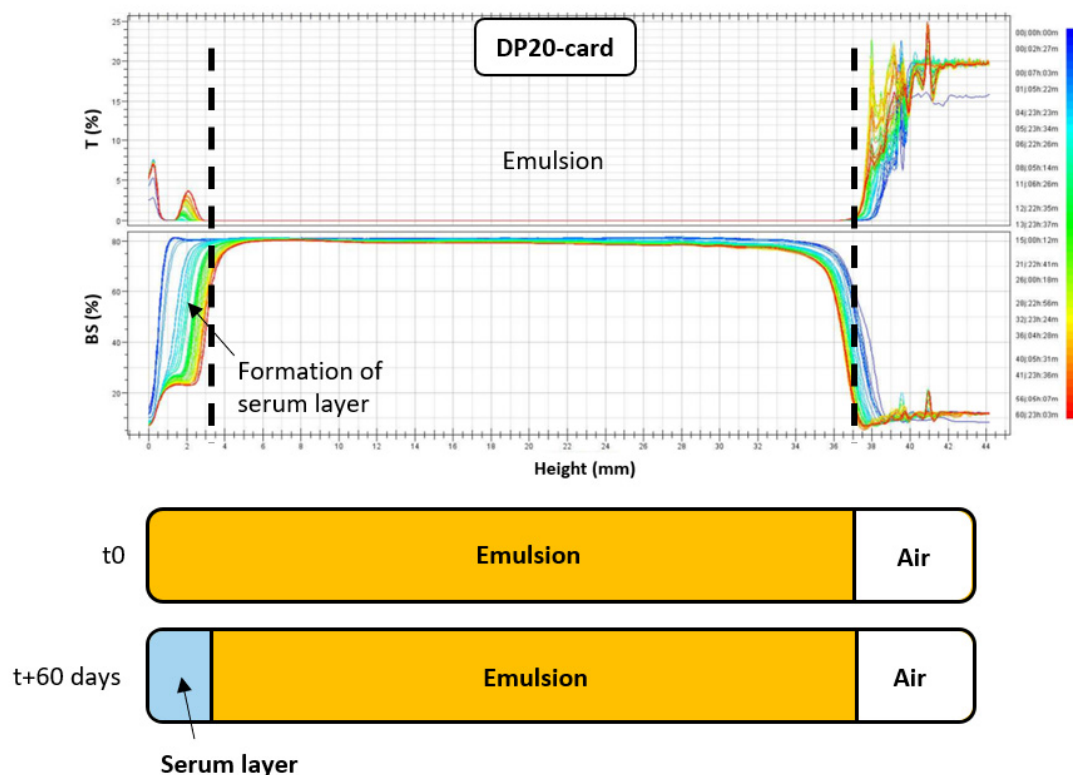

**Figure S13.** Transmission and backscattering profiles evolution as a function of time for the emulsion with DP20-card during 60 days. Horizontal representation of emulsion column at t0 and after 60 days.

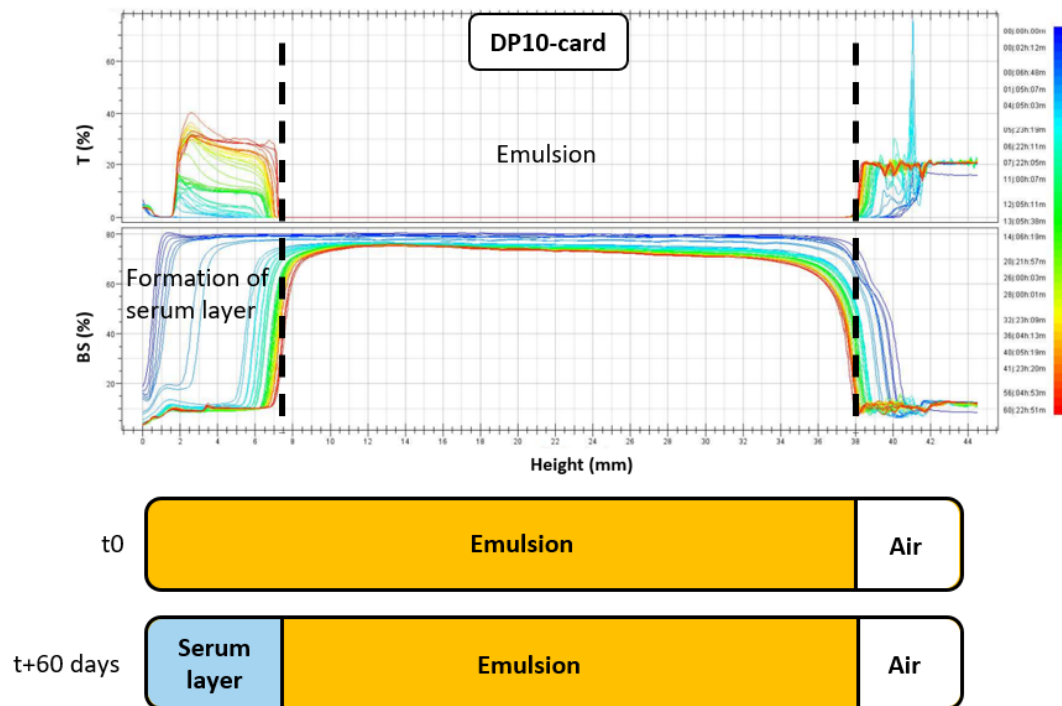

**Figure S14.** Transmission and backscattering profiles evolution as a function of time for the emulsion with DP10-card during 60 days. Horizontal representation of emulsion column at  $t_0$  and after 60 days.

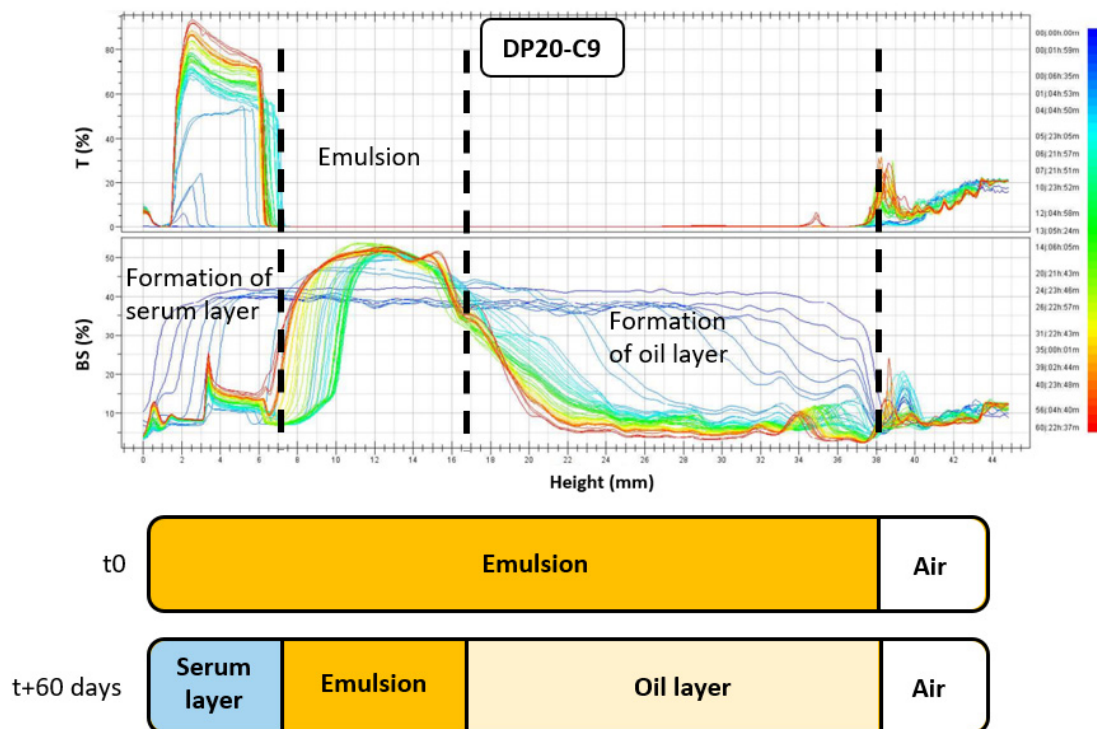

**Figure S15.** Transmission and backscattering profiles evolution as a function of time for the emulsion with DP20-C9 during 60 days. Horizontal representation of emulsion column at  $t_0$  and after 60 days.
